# Supplementary material for: Construction of dentate bonded TiO2–CdSe heterostructures with enhanced photoelectrochemical properties: versatile labels toward photoelectrochemical and electrochemical sensing
Source: Royal Society of Chemistry journal article supplement (doi:10.1039/c4dt02576h), 2014-11-04
Supplement: c4dt02576h1.pdf [file c4dt02576h1.pdf]

## **Electronic Supplementary Information**

**Construction of dentate bonded TiO<sub>2</sub>-CdSe heterostructures with enhanced photoelectrochemical property: Versatile labels toward photoelectrochemical and electrochemical biosensing**

**Picheng Gao, Hongmin Ma, Tao Yan, Dan Wu, Xiang Ren, Jiaojiao Yang, Bin Du and Qin Wei\***

*Key Laboratory of Chemical Sensing & Analysis in Universities of Shandong, School of Chemistry and Chemical Engineering, University of Jinan, Jinan 250022, China*

\*Corresponding author. Tel.: +86 531 82767872.

E-mail address: sdjndxwq@163.com (Q. Wei).

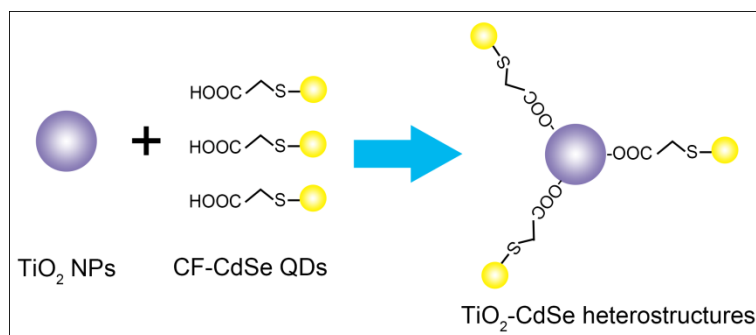

**Scheme S1.** Schematic illustration for the formation process and mechanism of  $\text{TiO}_2\text{-CdSe}$  heterostructures.

### Preparation of AuNPs

Typically, 25 mL 0.01 % (wt)  $\text{HAuCl}_4$  aqueous solution was stored in 50 mL round-bottom flask and heated to boiling, then 0.4 mL 1%(wt) sodium citrate was added into the boiling solution under stirring for 30 min. Gold colloidal solution in wine red color was obtained eventually and was used for the following modification of the immunosensor.

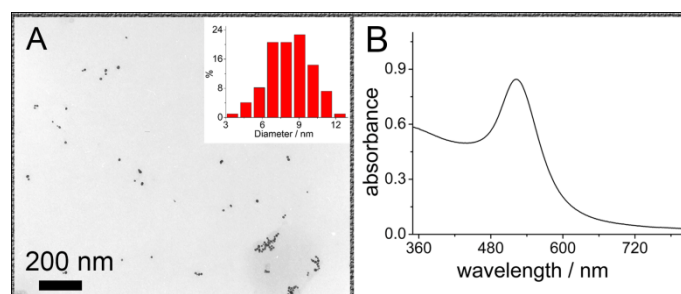

**Fig.S1** TEM image (A) and UV-vis spectrum (B) of AuNPs. Inset of A shows size distribution of AuNPs.

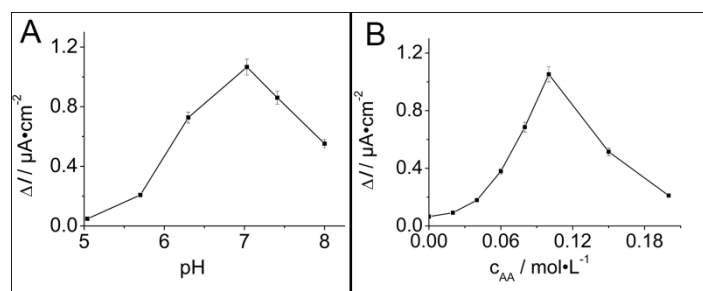

**Fig. S2** Optimization of pH (A) and AA concentration (B).

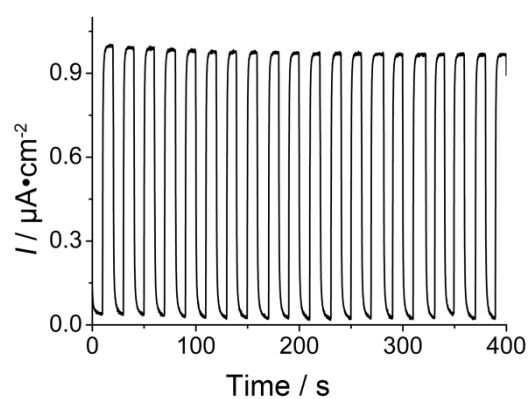

**Fig. S3** Time-based photocurrent response of the immunosensor incubated with  $5 \text{ ng}\cdot\text{mL}^{-1}$  HIgG. A 30 W white LED light was used as the illumination source and the applied potential is 0 V.

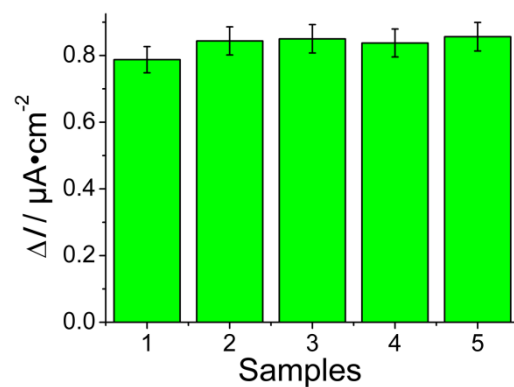

**Fig. S4** Reproducibility of the immunosensor detected by PEC method.

Table S1. Detection results of HIgG in human serum

| Detected concentration of HIgG in serum sample (ng·mL <sup>-1</sup> ) | Added HIgG (ng·mL <sup>-1</sup> ) | Detected concentration of HIgG by PEC (ng·mL <sup>-1</sup> ) | RSD (%) | Recovery (%) | Detected concentration of HIgG by EC (ng·mL <sup>-1</sup> ) | RSD  | Recovery |
|-----------------------------------------------------------------------|-----------------------------------|--------------------------------------------------------------|---------|--------------|-------------------------------------------------------------|------|----------|
| 0.65                                                                  | 0.30                              | 0.98, 0.92,<br>0.90, 1.01,<br>1.02                           | 5.64    | 101.7        | 1.05, 1.02,<br>0.92, 0.99,<br>0.98                          | 5.12 | 104.4    |
|                                                                       | 0.60                              | 1.20, 1.18,<br>1.26, 1.33,<br>1.21                           | 4.82    | 98.8         | 1.31, 1.35,<br>1.22, 1.28,<br>1.19                          | 5.21 | 101.6    |
|                                                                       | 1.00                              | 1.71, 1.68,<br>1.75, 1.61,<br>1.68                           | 3.11    | 102.2        | 1.58, 1.62,<br>1.56, 1.69,<br>1.61                          | 3.01 | 97.7     |
